# Supplementary material
Source: bioRxiv or medRxiv preprint supplement (https://www.biorxiv.org/content/biorxiv/early/2020/11/20/2020.11.18.388199.1/DC2/embed/media-2.pdf)
Supplement: Supplementary file [file media-2.pdf]

**Supplementary Table 1. Primers list for RT-qPCR**

| <b>Gene</b>                     | <b>Forward primer (5' - 3')</b> | <b>Reverse primer (5' - 3')</b> |
|---------------------------------|---------------------------------|---------------------------------|
| <i>Ucp1</i>                     | CACTCAGGATTGGCCTCTACG           | GGGGTTTGATCCCATGCAGA            |
| <i>mitoDNA</i>                  | TTAAGACACCTTGCCTAGCCACAC        | CGGTGGCTGGCACGAAATT             |
| <i>Dio2</i>                     | GATGCTCCCAATTCCAGTGT            | TGAACCAAAGTTGACCACCA            |
| <i><math>\beta</math>-ACTIN</i> | GGCTGTATTCCCCTCCATCG            | CCAGTTGGTAACAATGCCATGT          |
| <i>Fasn</i>                     | AGGATATGGAGAGGGCTGGT            | ACCCAAGCATCATTTCGTC             |
| <i>Pgc1<math>\alpha</math></i>  | CCCTGCCATTGTAAAGACC             | TGCTGCTGTTCCCTGTTTTTC           |
| <i>Cidea</i>                    | TGACATTCATGGGATTGCAGAC          | GGCCAGTTGTGATGACTAAGAC          |
| <i>Elovl3</i>                   | TTCTCACGCGGGTTAAAAATGG          | GAGCAACAGATAGACGACCAC           |
| <i>Atp5a</i>                    | TTTGCCAGTTTGGTTCTGAT            | CCCGTACACCCGCATAGATAA           |
| <i>Uqcrc2</i>                   | TGGCTCTGGTTGGACTTGGT            | TTTCACCTCCACGGTATTTGG           |
| <i>Sdhb</i>                     | CTGTGAGGGGCACAGAC               | CAACACCATAGGTCCGCACT            |
| <i>Ndufb8</i>                   | GGCACGTGTTCCCTTCCTAC            | CCGCTCCAGGTACAGATTATTGT         |
| <i>Cox8b</i>                    | GAACCATGAAGCCAACGACT            | GCGAAGTTCACAGTGGTTCC            |
| <i>HSL</i>                      | GAGACACCAGCCAACGGATAC           | TTTTGCGGTTAGAAGCCACAT           |
| <i>Cpt2</i>                     | GGCCACCAACTTGACTGTTT            | GAAGGAACAAAGCGGATGAG            |
| <i>Glut1</i>                    | TCAACACGGCCTTCACTG              | CACGATGCTCAGATAGGACATC          |
| <i>HK2</i>                      | TGATCGCCTGCTTATTCACGG           | AACCGCCTAGAAATCTCCAGA           |
| <i>Mtcol1</i>                   | ACACATGAGCAAAAAGCCCAC           | AGTCTGAGTAGCGTCGTGGT            |
| <i>PPAR<math>\gamma</math></i>  | CCGTAGAAGCCGTGCAAGAG            | GGAGGCCAGCATCGTGTAGA            |
| <i>NucDNA</i>                   | ATGACGATATCGCTGCGCTG            | TCACTTACCTGGTGCCTAGGGC          |
| <i>Letmd1</i>                   | CGGGAGATGGAGCATTTGAGACAG        | GGCAAAGGGTGGAAATGGAGATGAG       |
| <i>Pgc1<math>\alpha</math></i>  | CCC TGC CAT TGT TAA GAC C       | TGC TGC TGT TCC TGT TTT C       |

**Supplementary Table 2. Antibody list**

| <b>Antibody</b> | <b>Company</b>           |
|-----------------|--------------------------|
| UCP1            | Abcam, USA               |
| LETMD1          | Abcam, USA               |
| SCA-1-APC       | Miltenyi Biotec, Germany |
| CD11B-FITC      | Miltenyi Biotec, Germany |
| CD45-PE         | Miltenyi Biotec, Germany |
| HSP90           | Proteintech, USA         |
| TOMM20          | Proteintech, USA         |
| A-TUBULIN       | Proteintech, USA         |
| MFN2            | Proteintech, USA         |
| DRP1            | Proteintech, USA         |
